# Supplementary material for: Probiotic Ingestion, Obesity, and Metabolic-Related Disorders: Results from NHANES, 1999–2014
Source: PubMed Central journal article supplement (PMC6683043; doi:10.3390/nu11071482), 2019-06-28
Supplement: nutrients-11-01482-s001.pdf [file nutrients-11-01482-s001.pdf]

Supplementary data

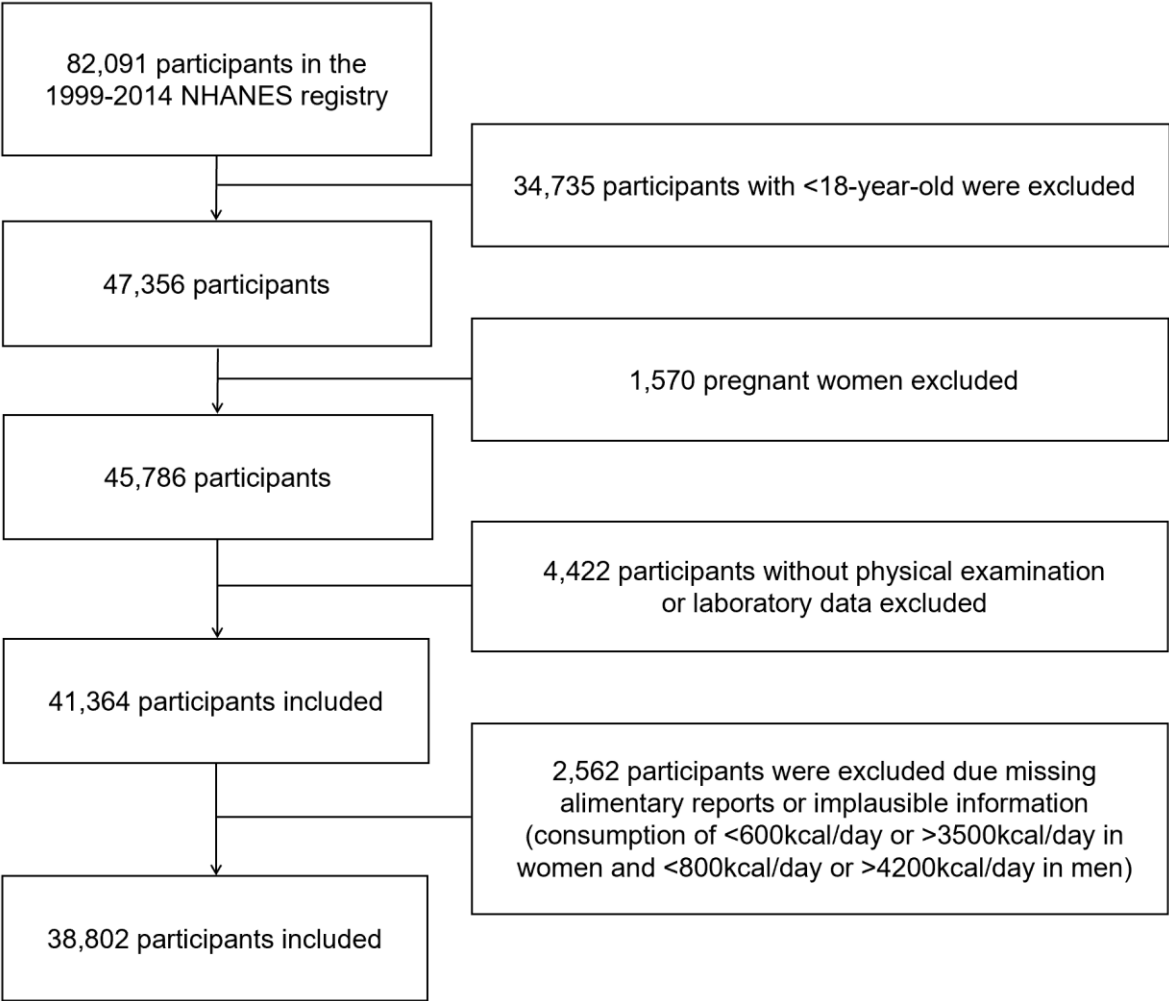

Figure S1. - Flowchart of the study population

**Table S1.** – Probiotic supplements included.

|                                                                                                                                                                         |
|-------------------------------------------------------------------------------------------------------------------------------------------------------------------------|
| 21ST CENTURY HIGH POTENCY ACIDOPHILUS                                                                                                                                   |
| 365 PROBIOTIC COMPLEX WITH ACIDOPHILUS DOUBLE STRENGTH                                                                                                                  |
| 4X PROBIOTIC UP&UP CONTAINS 4 STRAINS OF NATURAL, BENEFICIAL BACTERIA WITH B. INFANTIS 10 MG                                                                            |
| ACCUFLORA ADVANCED CD PROBIOTIC 5 PROBIOTIC STRAINS ADVANCED CD: CONTROLLED DELIVERY                                                                                    |
| ADVANCED NATURALS FLORAMAX ADVANCED PROBIOTIC FORMULA 12 BILLION CELLS OF 7 STRAINS OF MICROFLORA WITH ACIDOPHILUS, BIFI                                                |
| ALIGN PROBIOTIC                                                                                                                                                         |
| ALIGN PROBIOTIC B. INFANTIS 35624 WITH: UNIQUE B. INFANTIS 35624                                                                                                        |
| ALLERGY RESEARCH GROUP BIFIDOBOTICS WITH L. SPOROGENES                                                                                                                  |
| ALLERGY RESEARCH GROUP GI FLORA L.ACIDOPHILUS, L.CASEI, L. RHAMNOSUS, B. LONGUM HYPOALLERGENIC                                                                          |
| AMERICAN HEALTH CHEWABLE ACIDOPHILUS WITH BIFIDUS MILK FREE                                                                                                             |
| AMERICAN HEALTH CHEWABLE MILK FREE ACIDOPHILUS AND BIFIDUM ONE BILLION ORGANISMS VEGETARIAN FORMULA                                                                     |
| BACID PROBIOTIC CONTAINS A BLEND OF BENEFICIAL BACTERIA INCLUDING LACTOBACILLUS ACIDOPHILUS                                                                             |
| BASIC'S NATURAL ACIDOPHILUS BASIC VITAMINS                                                                                                                              |
| BIOGAIA PROBIOTICS GERBER SOOTHE COLIC DROPS PROBIOTIC                                                                                                                  |
| BIORAY CYTOFLORA PROBIOTIC IMMUNITY TONIC DAILY                                                                                                                         |
| BIOSPEC PROBIOTIC PLUS HIGH POTENCY, MULTI-STRAIN PROBIOTIC                                                                                                             |
| BLUEBONNET MILK-FREE ACIDOPHILUS PLUS FOS L. ACIDOPHILUS, L. BULGARICUS, BIFIDUS                                                                                        |
| BREAKTHROUGH FORMULATIONS MEGA-FLORA DIGESTIVE TRACT FLORA                                                                                                              |
| CELL NUTRITIONALS PROBIOTICS AR ACID RESISTENT 16 STRAIN FORMULA COMPREHENSIVE, DAIRY FREE FORMULA PROVIDING 12 BILLION VIABLE CELLS PER CAPSULE AT TIME OF MANUFACTURE |
| COUNTRY LIFE DAIRY-FREE ACIDOPHILUS WITH PECTIN                                                                                                                         |
| COUNTRY LIFE POWER-DOPHILUS WITH FOS HYPOALLERGENIC MILK FREE                                                                                                           |
| CULTURELLE DIGESTIVE HEALTH PROBIOTIC PROBIOTIC WITH NATURALLY SOURCED DAIRY-FREE LACTOBACILLUS GG ONCE DAILY CAPSULES 10 BILLION ACTIVE CULTURES                       |
| CULTURELLE KIDS! PACKETS PROBIOTIC PROBIOTIC WITH NATURALLY SOURCED LACTOBACILLUS GG                                                                                    |
| CULTURELLE WITH LACTOBACILLUS GG                                                                                                                                        |
| CVS PHARMACY EXTRA STRENGTH ACIDOPHILUS                                                                                                                                 |
| DDS-100 ACIDOPHILUS WITH FOS CHEWABLE TABLETS (2 BILLION CFU/G) UAS LABORATORIES                                                                                        |
| DEFAULT LACTOBACILLUS ACIDOPHILUS                                                                                                                                       |
| DEFAULT PROBIOTIC                                                                                                                                                       |
| DESIGNS FOR HEALTH PROBIOTIC SYNERGY POWDER 20 BILLION ORGANISMS PER SERVING                                                                                            |

|                                                                                                                                                         |
|---------------------------------------------------------------------------------------------------------------------------------------------------------|
| DIGESTIVE ADVANTAGE LACTOSE DEFENSE FORMULA DUAL-ACTION! ENZYME PLUS PROBIOTICS TAKE EVERY DAY                                                          |
| DIGESTIVE ENZYMES & PROBIOTICS WITH ENZYGUARD-D 4LIFE                                                                                                   |
| DIGESTZEN PB ASSIST+ PROBIOTIC DEFENSE FORMULA DOTERRA                                                                                                  |
| ECOQUEST / INFINITY ESSENTIALS FOR LIFE 2 ENZYME, FLORA AND CHROMIUM COMPLEX                                                                            |
| ENERGETIX FLORA SYNERGY                                                                                                                                 |
| ENZYMATIC THERAPY NATURAL MEDICINES ACIDOPHILUS PEARLS WITH L. ACIDOPHILUS AND B. LONGUM                                                                |
| ENZYMATIC THERAPY PROBIOTIC PEARLS HIGH POTENCY ADVANCED 3-LAYER SOFTGEL ONCE DAILY LACTOBACILLI & BIFIDOBACTERIA                                       |
| FINEST NUTRITION ACIDOPHILUS L. ACIDOPHILUS 1 BILLION CFUS (LIVE ORGANISMS) PER TABLET ONE PER DAY                                                      |
| FLORA BILBERRY EXTRACT 25% STANDARDIZED ANTHOCYANIDINS WITH FREEZE-DRIED BLUEBERRY POWDER                                                               |
| FLORA CERTIFIED ORGANIC FLAX OIL COLD-PRESSED & UNREFINED                                                                                               |
| FLORA FLOR-ESSENCE                                                                                                                                      |
| FLORA UDO'S CHOICE OIL BLEND CERTIFIED ORGANIC BLEND OF FLAX AND OTHER NUTRITIONALLY SUPERIOR OILS                                                      |
| FLORA UDO'S CHOICE UDO'S OIL DHA 3-6-9 BLEND BASED ON THE IDEAL 2:1:1 RATIO OF OMEGA FATTY ACIDS                                                        |
| FLORA WHITE WILLOW BARK 55 MG STANDARDIZED SALICIN                                                                                                      |
| FLORABABY ADVANCED PROBIOTIC FORMULA FOR INFANTS & TODDLERS 5 STRAINS OF BENEFICIAL PROBIOTICS 4 BILLION LIVE CULTURES PER SERVING PROBIOTIC RENEW LIFE |
| FLORADIX CALCIUM-MAGNESIUM WITH ZINC, VITAMIN D AND HERBS                                                                                               |
| FLORADIX FLORAVITAL IRON + HERBS LIQUID EXTRACT FORMULA RICH IN IRON AND B-VITAMINS VEGETARIAN LIQUID FORMULA                                           |
| FLORADIX IRON + HERB TABLETS HIGH POTENCY IRON WITH VITAMINS, YEAST AND HERB EXTRACTS                                                                   |
| FLORADIX KINDER LOVE CHILDREN'S MULTIVITAMIN LIQUID EXTRACT FORMULA VITAMINS A, B, C, D AND E WITH CALCIUM, HERBAL EXTRA                                |
| FLORADIX TABLETS WITH IRON, VITAMINS, YEAST AND HERB EXTRACTS                                                                                           |
| FLORAJEN3 HIGH POTENCY PROBIOTIC ACIDOPHILUS BIFIDUM LONGUM 15 BILLION LIVE CULTURES PER CAPSULE                                                        |
| FRIENDLY FLORA PREBIOTIC AND PROBIOTIC COMPLEX FOS AND LACTOBACILLUS 5 BILLION CFU PROCAPS LABORATORIES                                                 |
| FUSION PLUS IRON / FOLIC ACID / VITAMIN / PROBIOTIC CAPSULES                                                                                            |
| FUTUREBIOTICS COLON GREEN GENTLE, ALL-NATURAL FIBER WITH PROBIOTICS AND ENZYMES NOW WITH SUPER-STABLE PROBIOTICS                                        |
| GARDEN OF LIFE PRIMAL DEFENSE HSO PROBIOTIC FORMULA                                                                                                     |
| GARDEN OF LIFE PRIMAL DEFENSE ULTRA ULTIMATE PROBIOTIC FORMULA 15 BILLION CELLS DAILY 13 BENEFICIAL CULTURES WITH HSOS W                                |

|                                                                                                                                                                                                     |
|-----------------------------------------------------------------------------------------------------------------------------------------------------------------------------------------------------|
| GARDEN OF LIFE RAW BEYOND VITAMINS & MINERALS VITAMIN CODE 50 & WISER MEN RAW WHOLE FOOD MULTI LIVE PROBIOTICS & ENZYMES RAW FOOD-CREATED NUTRIENTS WITH CODE FACTORS RAW FOOD                      |
| GARDEN OF LIFE RAW PROBIOTICS WOMEN 50 & WISER 85 BILLION LIVE CULTURES 33 PROBIOTIC STRAINS PROBIOTIC-CREATED VITAMINS, MINERALS, ENZYMES & PREBIOTICS CONTAINS TARGETED PROBIOTICS RAW WHOLE FOOD |
| GARDEN OF LIFE RAW VITAMIN CODE 50 & WISER WOMEN RAW WHOLE FOOD MULTI LIVE PROBIOTICS & ENZYMES RAW FOOD-CREATED NUTRIEN                                                                            |
| GENERIC20 GR8-DOPHILUS 8 STRAINS & 4 BILLION POTENCY WITH FOS                                                                                                                                       |
| GENERIC36 ACIDOPHILUS PROBIOTIC BLEND                                                                                                                                                               |
| GENERIC7 PROBIOTIC ACIDOPHILUS                                                                                                                                                                      |
| GENERIC8 ACIDOPHILUS & PROBIOTIC COMPLEX                                                                                                                                                            |
| GNC NATURAL BRAND ACIDOPHILUS 2 BILLION CFU                                                                                                                                                         |
| GNC NATURAL BRAND ACIDOPHILUS 4 BILLION CFU                                                                                                                                                         |
| GNC NATURAL BRAND MEGA ACIDOPHILUS                                                                                                                                                                  |
| GNC NATURAL BRAND POTENT ACIDOPHILUS                                                                                                                                                                |
| GNC NATURAL BRAND ULTRA ACIDOPHILUS 350 MG                                                                                                                                                          |
| GNC PROBIOTIC COMPLEX CHEWABLE TABLET 1.5 BILLION CFUS                                                                                                                                              |
| GNC PROBIOTICS PROBIOTIC COMPLEX 4 4 BILLION CFUS                                                                                                                                                   |
| GNC PROBIOTICS ULTRA 25 BILLION CFUS PROBIOTIC COMPLEX                                                                                                                                              |
| GNC ULTRA 50 BILLION CFUS PROBIOTIC COMPLEX GUARANTEED POTENCY 50                                                                                                                                   |
| GNC WOMEN'S ULTRA MEGA WITH PROBIOTICS MULTIVITAMIN DELIVERS 1 BILLION LIVE, ACTIVE CULTURES WITH 1,600 IU OF VITAMIN D-3                                                                           |
| HEALTH PLUS INC. SUPER COLON CLEANSE WITH HERBS & ACIDOPHILUS                                                                                                                                       |
| HEALTHWAY MEDICAL, P.C. PRO-C 750 MG VITAMIN C WITH PROBIOTICS VEGETARIAN                                                                                                                           |
| HEALTHY ORIGINS NATURAL PROBIOTIC 30 BILLION CFU'S 8 STRAINS AND 30 BILLION COLONY FORMING UNITS FLORAFIT                                                                                           |
| HERBALIFE FLORAFIBER LACTOBACILLUS ACIDOPHILUS AND FIBER                                                                                                                                            |
| JARROW FORMULAS BABY JARRO-DOPHILUS +FOS WITH CLINICALLY DOCUMENTED STRAINS 3 BILLION PROBIOTIC                                                                                                     |
| JARROW FORMULAS BABY'S JARRO-DOPHILUS WITH CLINICALLY DOCUMENTED STRAINS 3 BILLION PER GRAM HYPOALLERGENIC NON-DAIRY PRO                                                                            |
| JARROW FORMULAS ENHANCED PROBIOTIC SYSTEM JARRO-DOPHILUS EPS ENTERIC COATED                                                                                                                         |
| JARROW FORMULAS JARRO-DOPHILUS + FOS 6 BENEFICIAL PROBIOTIC STRAINS WITH CLINICALLY DOCUMENTED STRAINS 3.4 BILLION PER CAPSULE PROBIOTIC                                                            |
| JARROW FORMULAS JARRO-DOPHILUS ORIGINAL WITH CLINICALLY DOCUMENTED STRAINS 6 BENEFICIAL PROBIOTIC STRAINS 3.4 BILLION PER CAPSULE PROBIOTIC                                                         |
| JUICE FOR LIFE POWER FRUIT FORMULA WHOLE FOOD CONCENTRATES WITH ENZYMES, PROBIOTICS & ANTIOXIDANTS                                                                                                  |
| JUICEFESTIV FRUITFESTIV 23 FRUITS, ANTIOXIDANTS, PROBIOTICS & DIGESTIVE ENZYMES FEATURES: ACAI, POMEGRANATE, BLUEBERRY AND NONI NATROL                                                              |

|                                                                                                                                                                          |
|--------------------------------------------------------------------------------------------------------------------------------------------------------------------------|
| KID'S KYO-DOPHILUS PROBIOTIC ONE PER DAY                                                                                                                                 |
| KLAIRE LABS THER-BIOTIC INFANT FORMULA 10+ BILLION CFUS MULTI-SPECIES PROBIOTIC                                                                                          |
| KYO-DOPHILUS                                                                                                                                                             |
| KYO-DOPHILUS PROBIOTICS PLUS CRANBERRY EXTRACT                                                                                                                           |
| L'IL CRITTERS PROBIOTIC ACIDOPHILUS DAILY                                                                                                                                |
| L.A. FARMACIA NATURAL MICROENCAPSULATED ACIDOPHILUS                                                                                                                      |
| LIFETIME LIQUID ACIDOPHILUS SOY BASE MILK FREE                                                                                                                           |
| MASON NATURAL CHEWABLE SOLUBLE FIBER WITH PROBIOTICS ADULTS & KIDS                                                                                                       |
| MEGAFLORA OPTIMAL POTENCY PROBIOTIC FORMULA 100% WHOLE FOOD MEGAFOOD                                                                                                     |
| METAGENICS LACTO VIDEN ID DAIRY FREE, STRAIN MODIFIED LACTOBACILLUS BLEND                                                                                                |
| METAGENICS ULTRA FLORA PLUS DF CAPSULES                                                                                                                                  |
| METAGENICS ULTRAFLOA IMMUNE HEALTH PROBIOTIC                                                                                                                             |
| MILK, COW'S, FLUID, ACIDOPHILUS, 1% FAT                                                                                                                                  |
| MILK, COW'S, FLUID, ACIDOPHILUS, 2% FAT                                                                                                                                  |
| NATREN'S MEGA DOPHILUS DAIRY CAPSULES                                                                                                                                    |
| NATREN'S MEGA DOPHILUS DAIRY POWDER                                                                                                                                      |
| NATROL ACIDOPHILUS PROBIOTIC                                                                                                                                             |
| NATURAL FACTORS MULTI ACIDOPHILUS WITH FOS CAPSULES 4 BILLION ACTIVE CELLS                                                                                               |
| NATURE CITY TRUELIFE PB PROBIOTIC AND PREBIOTIC BLEND PROFESSIONAL STRENGTH! 30 BILLION LIVE 'GOOD BACTERIA' CELLS PER DOSE PROVIDES 6 HEALTH BOOSTING PROBIOTIC STRAINS |
| NATURE MADE ACIDOPHILUS 500 MILLION LIVE CELLS PER TABLET                                                                                                                |
| NATURE MADE ACIDOPHILUS PROBIOTICS 1 BILLION LIVE CELLS PER SERVING                                                                                                      |
| NATURE MADE TRIPLE PROBIOTIC                                                                                                                                             |
| NATURE'S BLEND HIGH POTENCY CHEWABLE ACIDOPHILUS                                                                                                                         |
| NATURE'S BLEND PROBIOTIC BLEND                                                                                                                                           |
| NATURE'S BOUNTY ACIDOPHILUS                                                                                                                                              |
| NATURE'S BOUNTY ACIDOPHILUS PROBIOTIC 100 MILLION ORGANISMS LACTOBACILLUS ACIDOPHILUS 1 PER DAY TABLET                                                                   |
| NATURE'S BOUNTY CHEWABLE PROBIOTIC ACIDOPHILUS 1 BILLION ORGANISMS WITH BIFIDUM CHEWABLE MILK FREE WAFER                                                                 |
| NATURE'S BOUNTY PROBIOTIC ACIDOPHILUS                                                                                                                                    |
| NATURE'S BOUNTY PROBIOTIC ACIDOPHILUS 100 MILLION ORGANISMS LACTOBACILLUS ACIDOPHILUS 1 PER DAY CAPSULE                                                                  |
| NATURE'S BOUNTY PROBIOTIC ACIDOPHILUS CAPSULES                                                                                                                           |
| NATURE'S BOUNTY ULTRA STRENGTH ADVANCED PROBIOTIC 10 10 PROBIOTIC ORGANISMS WITH ACTIVE CULTURE SUPPORT 20 BILLION LIVE PROBIOTIC CULTURES                               |
| NATURE'S LIFE LACTOBACILLUS ACIDOPHILUS APPLE PECTIN LIVE, ACTIVE ORGANISMS PROBIOTIC CAPSULES                                                                           |
| NATURE'S PLUS ADULT'S EAR, NOSE & THROAT LOZENGES WITH K12 PROBIOTICS                                                                                                    |

|                                                                                                                                                                                                          |
|----------------------------------------------------------------------------------------------------------------------------------------------------------------------------------------------------------|
| NATURE'S PLUS SOURCE OF LIFE ANIMAL PARADE ACIDOPHIKIDZ WITH PROBIOTICS, FOS & RHODODENDRON CHILDREN'S CHEWABLE WITH WHO                                                                                 |
| NATURE'S SUNSHINE BIFIDOPHILUS FLORA FORCE BIFIDOBACTERIUM LONGUM & LACTOBACILLUS ACIDOPHILUS 470 MG                                                                                                     |
| NATURE'S SUNSHINE BIFIDOPHILUS FLORA FORCE PROBIOTIC 4 BILLION TOTAL MICROORGANISMS PER CAPSULE                                                                                                          |
| NATURE'S SUNSHINE PROBIOTIC ELEVEN                                                                                                                                                                       |
| NATURE'S WAY ONCE DAILY PRIMADOPHILUS                                                                                                                                                                    |
| NATURE'S WAY ONCE DAILY PRIMADOPHILUS CHILDREN POWDER WITH FOS TRUE IDENTITY BIFIDOBACTERIA & LACTOBACILLI TRUE POTENCY                                                                                  |
| NATURE'S WAY ONCE DAILY PRIMADOPHILUS CHILDREN POWDER WITH SCFOS TRUE IDENTITY BIFIDOBACTERIA & LACTOBACILLI TRUE POTENCY 3 BILLION CFU                                                                  |
| NATURE'S WAY ONCE DAILY PRIMADOPHILUS FOR CHILDREN                                                                                                                                                       |
| NATURE'S WAY ONCE DAILY PRIMADOPHILUS JUNIOR TRUE IDENTITY LACTOBACILLI & BIFIDOBACTERIA TRUE POTENCY 3 BILLION CFU TRUE                                                                                 |
| NATURE'S WAY ONCE DAILY PRIMADOPHILUS KIDS TRUE POTENCY 3 BILLION CFU TRUE IDENTITY LACTOBACILLI & BIFIDOBACTERIA ORANGE                                                                                 |
| NATURE'S WAY ONCE DAILY PRIMADOPHILUS KIDS TRUE POTENCY 3 BILLION CFU TRUE IDENTITY LACTOBACILLI & BIFIDOBACTERIA ORANGE AGES 2-12                                                                       |
| NATURE'S WAY PRIMADOPHILUS BIFIDUS ONCE DAILY TRUE POTENCY 5 BILLION CFU TRUE IDENTITY BIFIDOBACTERIA & LACTOBACILLI TRU                                                                                 |
| NATURE'S WAY PRIMADOPHILUS ORIGINAL ONCE DAILY TRUE POTENCY 5 BILLION CFU TRUE IDENTITY ACIDOPHILUS & RHAMNOSUS TRUE RELEASE TARGETED DELIVERY ENTERIC-COATED FOR ALL AGES                               |
| NATURE'S WAY PRIMADOPHILUS REUTERI SUPERIOR PROBIOTIC MULTI STRAIN PLUS SCFOS TRUE POTENCY 5 BILLION CFU ENTERIC-COATED ONCE DAILY                                                                       |
| NEW CHAPTER EVERY MAN II WHOLE-FOOD PROBIOTIC MULTI-NUTRIENT, MINERAL & HERBAL COMPLEX                                                                                                                   |
| NEW CHAPTER EVERY WOMAN WHOLE-FOOD PROBIOTIC MULTI-VITAMIN, MINERAL & HERBAL COMPLEX                                                                                                                     |
| NEW CHAPTER EVERY WOMAN'S ONE DAILY WHOLE-FOOD PROBIOTIC MULTI-VITAMIN, MINERAL & HERBAL COMPLEX                                                                                                         |
| NEW CHAPTER ORGANICS PROBIOTIC NUTRIENTS EVERY MAN II FOR MEN OVER 40 MADE WITH ORGANIC INGREDIENTS                                                                                                      |
| NEW CHAPTER ORGANICS PROBIOTIC NUTRIENTS PERFECT PRENATAL                                                                                                                                                |
| NEW CHAPTER VITAMIN B COMPLEX WHOLE-FOOD HERBAL PROBIOTIC NUTRIENT COMPLEX                                                                                                                               |
| NEW VITALITY RUBY REDS NEW & IMPROVED FORMULA POMEGRANATE, ACAI & MAQUI A DELICIOUS FRUIT AND VEGETABLE WITH POTENT VITAMINS, MINERALS, ENZYMES, HERBS, NUTRIENTS AND PROBIOTICS 100% DAILY VALUE 7 VITA |
| NOW BERRY DOPHILUS 4 PROBIOTIC STRAINS 2.5 BILLION INPUT NATURAL BERRY FLAVOR XYLITOL SWEETENED CHEWABLES                                                                                                |

|                                                                                                                          |
|--------------------------------------------------------------------------------------------------------------------------|
| NSI NUTRACEUTICAL SCIENCES INSTITUTE PROBIOTIC 15-35 15 STRAINS / 35 BILLION MICROORGANISMS PER SERVING                  |
| NUTRI-HEALTH FLORA SOURCE MULTI-PROBIOTIC BLEND OF 16 STRAINS / 16 BILLION CELLS CAPSULES                                |
| NUTRICOLOGY PROGREENS WITH ADVANCED PROBIOTIC FORMULA                                                                    |
| NUTRILITE INTESTIFLORA-7 STICK PACKS                                                                                     |
| NUTRITION NOW PB8 PRO-BIOTIC ACIDOPHILUS FOR LIFE ORIGINAL FORMULA 14 BILLION GOOD BACTERIA                              |
| NUTRITION NOW PROBIOTIC ACIDOPHILUS                                                                                      |
| NUTRITION NOW RHINO CHEWABLE FOS & ACIDOPHILUS CHEWABLE TABLETS 100% DAILY VALUE OF VITAMIN C                            |
| O'DONNELL FORMULAS, INC. FLORA-BALANCE BACILLUS LATERO SPORUS BOD STRAIN CAPSULES                                        |
| OPTIMUM FREEZE DRIED ACIDOPHILUS LACTOBACILLI                                                                            |
| ORIGIN ACIDOPHILUS EASY TO SWALLOW                                                                                       |
| PB8 PRO-BIOTIC ACIDOPHILUS FOR LIFE                                                                                      |
| PHILLIPS' COLON HEALTH PROBIOTIC CAPS BAYER                                                                              |
| PHILLIPS' COLON HEALTH PROBIOTIC CAPS DAILY PROBIOTIC ONE DAILY BAYER                                                    |
| PREMIER RESEARCH LABS GALLBLADDER-ND PROBIOTIC-DERIVED FORMULA FEATURING ND TECHNOLOGY                                   |
| PRO-BIOTICS ACIDOPHILUS                                                                                                  |
| PROBIOTIC PEARLS WITH L. ACIDOPHILUS AND B. LONGUM                                                                       |
| PROBIOTICA LACTOBACILLUS REUTERI CHEWABLE TABLETS                                                                        |
| PROCAPS LABORATORIES FIBERMUCIL U.S.P. PSYLLIUM BULK AND WATER SOLUBLE FIBER FRIENDLY FLORA LACTOBACILLUS                |
| PROJOBA INTERNATIONAL PROBACILLUS PLUS                                                                                   |
| PURE RESEARCH PRODUCTS, LLC DEL-IMMUNE V LACTOBACILLUS RHAMNOSUS LYSED POWDER                                            |
| PURITAN'S PRIDE ACIDOPHILUS                                                                                              |
| PURITAN'S PRIDE POTENT ACIDOPHILUS WITH PECTIN                                                                           |
| PURITAN'S PRIDE VITA-FRESH LIFE'S GREENS WITH ADVANCED PROBIOTIC FORMULA 29,205 TOTAL ORAC VALUE VEGETARIAN              |
| RAINBOW LIGHT 50+ MINI-TAB AGE-DEFENSE FORMULA FOOD-BASED MULTIVITAMIN WITH COQ10 1,000 IU VITAMIN D3 PROBIOTICS & DIGES |
| RAINBOW LIGHT ACTIVE HEALTH TEEN FOOD-BASED MULTIVITAMIN TARGETED TEEN NUTRITION 75 MILLION LIVE ACTIVE PROBIOTICS       |
| RAINBOW LIGHT JUST 1 ONCE NATURALS WOMEN'S ONE MULTIVITAMIN/MINERAL NOW WITH PROBIOTICS                                  |
| RAINBOW LIGHT KIDS ONE MULTISTARS CHEWABLE MULTIVITAMIN / MINERAL WHOLESOME VEGETABLE CONCENTRATES 15 MILLION ACTIVE PRO |
| RAINBOW LIGHT MEN'S ONE JUST 1 ONCE FOOD-BASED MULTIVITAMIN ENERGY B-COMPLEX & PROBIOTICS                                |

|                                                                                                                          |
|--------------------------------------------------------------------------------------------------------------------------|
| RAINBOW LIGHT WOMEN'S ONE JUST 1 ONCE FOOD-BASED MULTIVITAMIN 800 IU VITAMIN D3 & PROBIOTICS                             |
| RBC DIGESTION FORMULA WITH ENZYMES, PROBIOTICS AND NANOCCLUSERS                                                          |
| RENEW LIFE FLORABEAR FOR KIDS                                                                                            |
| REPHRESH PRO-B PROBIOTIC FEMININE                                                                                        |
| REXALL NATURALS GESTAZYME MULTI-ENZYME PROBIOTIC FORMULA ACIDOPHILUS PROBIOTIC FORMULA 1 BILLION ACTIVE CULTURES PER SER |
| REXALL NATURALS ULTIMATE PROBIOTIC FORMULA ACIDOPHILUS MADE WITH BIO FLORA 2 BILLION ACTIVE CULTURES                     |
| RITE AID PHARMACY NATURAL ACIDOPHILUS PROBIOTIC COMPLEX MILK FREE 300 MG                                                 |
| RITE AID PHARMACY PROBIOTIC COLON CARE LACTOBACILLUS ACIDOPHILUS, BIFIDOBACTERIUM LONGUM, B. BIFIDUM PROBIOTIC ONE DAILY |
| SALUS FLORADIX CALCIUM LIQUID MINERAL NO ADDED SUGAR HERBAL                                                              |
| SAV-ON OSCO CENTRAL-VITE SELECT MULTIVITAMIN/MULTIMINERAL FOR MATURE ADULTS WITH FLORAGLO LUTEIN                         |
| SAV-ON OSCO ONE CHOICE THE MOST COMPLETE MULTIVITAMIN WITH HERBS WITH FLORAGLO LUTEIN                                    |
| SCHIFF DIGESTIVE ADVANTAGE PROBIOTIC GUMMIES                                                                             |
| SCHIFF SUSTENEX PROBIOTIC GUMMIES                                                                                        |
| SHAKLEE BIFIDUS & ACIDOPHILUS OPTIFLORA PROBIOTIC COMPLEX                                                                |
| SHAKLEE OPTIFLORA FOS, INULIN, & MORE PREBIOTIC DIETARY SUPPLEMENT                                                       |
| SHAKLEE OPTIFLORA PREBIOTIC COMPLEX FOS, INULIN, & MORE                                                                  |
| SOLARAY MULTIDOPHILUS 12 OVER 20 BILLION MICROORGANISMS 12 PROBIOTIC STRAINS                                             |
| SOLGAR ADVANCED 40+ ACIDOPHILUS NON-DAIRY LACTOSE FREE                                                                   |
| SOLGAR ADVANCED ACIDOPHILUS PLUS 500 MILLION MICROORGANISMS PER USE                                                      |
| SPRING VALLEY 1 PER DAY DOSE ALL NATURAL CRANBERRY WITH VITAMIN C & PROBIOTICS NEW IMPROVED FORMULA                      |
| SPRING VALLEY ACIDOPHILUS                                                                                                |
| SPRING VALLEY PROBIOTIC ACIDOPHILUS 1 BILLION ACTIVE CULTURES                                                            |
| SPRING VALLEY PROBIOTIC MULTI-ENZYME DIGESTIVE FORMULA 1 BILLION ACTIVE CULTURES PER SERVING                             |
| SPRING VALLEY PROBIOTIC MULTI-ENZYME DIGESTIVE FORMULA WITH ACTIVE ACIDOPHILUS CULTURES                                  |
| SPRING VALLEY SUPER STRENGTH PROBIOTIC ACIDOPHILUS 2 BILLION ACTIVE CULTURES                                             |
| STOCKBRIDGE NATURALS TRI-DOPHILUS                                                                                        |
| SUNDOWN ACIDOPHILUS XTRA                                                                                                 |
| SUNDOWN NATURALS CHEWABLE ACIDOPHILUS WITH BIFIDUM 1 BILLION ACTIVE CULTURES PER WAFER VEGETARIAN FORMULA                |
| SUNDOWN NATURALS PROBIOTIC ACIDOPHILUS XTRA 40 MILLION LIVE CELLS PER SERVING VEGETARIAN FORMULA                         |



|                                                                                                                                                                                                          |
|----------------------------------------------------------------------------------------------------------------------------------------------------------------------------------------------------------|
| SUNDOWN NATURALS ULTIMATE PROBIOTIC FORMULA ACIDOPHILUS 2 BILLION ACTIVE CULTURES VEGETARIAN FORMULA 1 PER DAY                                                                                           |
| SUSTENEX DAILY PROBIOTIC 2 BILLION CELLS OF GANEDENBC30                                                                                                                                                  |
| SWANSON ULTRA FLORAGLO LUTEIN 10 MG SOFTGELS                                                                                                                                                             |
| SWANSON ULTRA PROBIOTIC COMPLEX                                                                                                                                                                          |
| THE HONEST CO. BABY & TODDLER MULTI POWDER COMPLETE MULTI-VITAMIN + MINERALS + SUPERFOODS + ANTIOXIDANTS + AMINO ACIDS + PROBIOTICS WHOLE-FOOD BASED ULTRA PURE GENTLE & ENRICHING HYPOALLERGENIC 100% N |
| THE VITAMIN SHOPPE ACIDOPHILUS WITH PECTIN                                                                                                                                                               |
| THE VITAMIN SHOPPE PSYLLIUM HUSK WITH ACIDOPHILUS                                                                                                                                                        |
| THE VITAMIN SHOPPE ULTIMATE '10' PROBIOTIC 13 BILLION ORGANISMS WITH FRUCTO-OLIGOSACCHARIDES ENTERIC COATED                                                                                              |
| THERALAC PROBIOTIC MASTER 5 HUMAN STRAINS 2 PREBIOTICS 5 + 2 30 BILLION CFU PER CAPSULE WITH LACTOSTIM                                                                                                   |
| TOTAL PROBIOTICS NUTRI-WEST                                                                                                                                                                              |
| TRADER JOE'S ACIDOPHILUS & PROBIOTIC COMPLEX 2 BILLION ORGANISMS PER TABLET                                                                                                                              |
| TRADER JOE'S ACTIVE 50+ ONCE DAILY MULTIVITAMIN & MINERAL PLUS PROBIOTICS 1000 IU VITAMIN D                                                                                                              |
| TRUBIOTICS DAILY PROBIOTIC FROM THE MAKERS OF ONE A DAY BAYER                                                                                                                                            |
| TRUNATURE DIGESTIVE PROBIOTIC 10 BILLION ACTIVE CULTURES                                                                                                                                                 |
| TWINLAB ALLERDOPHILUS ACIDOPHILUS CAPSULES HIGH POTENCY 182 MG                                                                                                                                           |
| ULTIMATE FLORA CRITICAL CARE 50 BILLION EXTRA-STRENGTH PROBIOTIC 10 PROBIOTIC STRAINS RENEW LIFE                                                                                                         |
| ULTIMATE FLORA EXTRA CARE DAILY PROBIOTIC 30 BILLION LIVE CULTURES PER CAPSULE 10 PROBIOTIC STRAINS ONE CAPSULE ONCE A DAY PROBIOTIC RENEW LIFE                                                          |
| ULTIMATE FLORA KIDS PROBIOTIC 3 BILLION LIVE CULTURES PER TABLET PROBIOTIC RENEW LIFE                                                                                                                    |
| VIBRANT HEALTH GREEN VIBRANCE 25 BILLION PROBIOTICS PER DOSE FROM 12 STRAINS ORGANIC GREENS & FREEZE DRIED GRASS JUICES                                                                                  |
| VITAMIN WORLD ACIDOPHILUS & PSYLLIUM HUSK 4 BILLION ACTIVE CULTURES 4,000 MG PSYLLIUM HUSK PER SERVING                                                                                                   |
| VITAMIN WORLD CHEWABLE ACIDOPHILUS WITH BIFIDUS NATURAL STRAWBERRY FLAVOR                                                                                                                                |
| WALGREENS ACIDOPHILUS 10 MG                                                                                                                                                                              |
| WALGREENS ACIDOPHILUS PLUS CITRUS PECTIN FREEZE DRIED                                                                                                                                                    |
| WINDMILL NATURAL ACIDOPHILUS PRO-BIOTIC BLEND WITH PECTIN                                                                                                                                                |
| Y.S. ORGANIC BEE FARMS 100% PURE BEE POLLEN CAPSULES MULTI FLORAL, WILD CRAFTED                                                                                                                          |
| NEW CHAPTER ORGANICS PROBIOTIC NUTRIENTS CAL MAG BONE HEALTH CALCIUM AND SYNERGISTIC NUTRIENTS IN THEIR MOST ACTIVE FORM                                                                                 |
| WHOLE FOODS PREMIER FORMULA PROBIOTIC COMPLEX PLUS                                                                                                                                                       |
| NUTRITION NOW PB8 PRO-BIOTIC ACIDOPHILUS FOR LIFE                                                                                                                                                        |
| CVS/PHARMACY ADULT PROBIOTIC 3 BILLION LIVE BACTERIA CELLS PER CAPSULE WITH 8 NATURAL PROBIOTIC STRAINS, INCLUDING 2 BIFIDOBACTERIA STRAINS ONE-A-DAY                                                    |

|                                                                                                                                                                              |
|------------------------------------------------------------------------------------------------------------------------------------------------------------------------------|
| CULTURELLE PROBIOTIC NATURAL HEALTH & WELLNESS ONCE DAILY CAPSULES ALL NATURAL PROBIOTIC WITH LACTOBACILLUS GG                                                               |
| RAINBOW LIGHT ACTIVE SENIOR JUST 1 ONCE FOOD-BASED MULTIVITAMIN B-COMPLEX 1,000 IU VITAMIN D3 & PROBIOTICS                                                                   |
| NEW CHAPTER ORGANICS PROBIOTIC ALL-FLORA WHOLE FOOD LIVE PROBIOTICS                                                                                                          |
| GARDEN OF LIFE RAW PROBIOTICS ULTIMATE CARE 100 BILLION GUARANTEED! 34 PROBIOTIC STRAINS ONCE DAILY INCLUDES THE CLINICALLY STUDIED REPLENISH BLEND RAW WHOLE FOOD PROBIOTIC |
| DEFAULT CHILDREN'S PROBIOTIC PACKET                                                                                                                                          |
| METABIOTIC PROBIOTIC WITH BIO-ACTIVE 12 PROBIOTIC                                                                                                                            |
| SPRING VALLEY PROBIOTIC ACIDOPHILUS 2 BILLION ACTIVE CULTURES                                                                                                                |
| DEFAULT GUMMY ADULT PROBIOTIC                                                                                                                                                |
| NATURE'S SUNSHINE L. ACIDOPHILUS MODIFIED RELEASE PROBIOTIC FORMULA                                                                                                          |
| DAVINCI LABORATORIES OF VERMONT NONDAIRY PROBIOTIC 50 VEGETARIAN / GLUTEN FREE                                                                                               |
| NATURE MADE DIGESTIVE HEALTH PROBIOTIC 10 BILLION LIVE CELLS ONCE DAILY                                                                                                      |

**Table S2. – Variables included in the adjusted models**

|                                | Variables included in all analyses                                                                                                                                                                                                                                                                                                                                                                                                                                                               | Variables included only in specific analysis                                                                                    |
|--------------------------------|--------------------------------------------------------------------------------------------------------------------------------------------------------------------------------------------------------------------------------------------------------------------------------------------------------------------------------------------------------------------------------------------------------------------------------------------------------------------------------------------------|---------------------------------------------------------------------------------------------------------------------------------|
| <b>Model 1</b>                 | Age, sex, ethnicity (Mexican American, other Hispanic, non-Hispanic white), annual family income (<\$25000, \$25000 to \$75000, >\$75000), and education (<9th grade, >= 9th grade)                                                                                                                                                                                                                                                                                                              |                                                                                                                                 |
| <b>Model 2</b>                 | Model 1 + alcohol intake, smoking status (never a smoker, current smoker, or former smoker), physical activity (low, intermediate, high), ingested kcal per day, ingested carbohydrates/kcal per day, ingested proteins/kcal per day, ingested fibres/kcal per day, and ingested polyunsaturated/saturated fatty acids ratio.                                                                                                                                                                    | BMI (all analyses except obesity related analyses);<br>Sodium intake per day (only in hypertension and blood pressure analyses) |
| <b>Model 3 (supplementary)</b> | Model 1 + alcohol intake, smoking status, physical activity, and DASH dietary pattern score*.<br><br>* The DASH score is based on 9 target nutrients (sodium, total fat, saturated fat, protein, fiber, cholesterol, calcium, magnesium, and potassium). Individuals meeting the DASH goal were given a score of 1.0 for that nutrient and if they attain an intermediate goal were given a score of 0.5 for that nutrient. The DASH score is the sum of the score for each individual nutrient. | BMI (all analyses except obesity related analyses);<br>Sodium intake per day (only in hypertension and blood pressure analyses) |

**Table S3.** – Odds ratio of disease in subjects exposed to probiotics compared to non-exposed (model 3).

|                     | <b>Model 3,<br/>OR (95%CI)</b> | <b>P value</b> |
|---------------------|--------------------------------|----------------|
| <b>Obesity</b>      | 0.86 (0.78-0.94)               | 0.002*         |
| <b>Diabetes</b>     | 1.01 (0.84-1.21)               | 0.937          |
| <b>Hypertension</b> | 0.79 (0.71-0.88)               | <0.001*        |
| <b>Dyslipidemia</b> | 1.00 (0.89-1.13)               | 0.957          |

Model 3: Model 1 + alcohol intake, smoking status, physical activity, and DASH dietary pattern score. Model 3 also includes BMI in all analyses except in the obesity analysis; and includes sodium intake per day only in the hypertension analysis. \*statistically significant

**Table S4.** – Variation of cardiometabolic parameters in participants exposed to probiotics compared to non-exposed (model 3).

|                                    | <b>Model 3</b>          | <b>P value</b> |
|------------------------------------|-------------------------|----------------|
| BMI, kg/m <sup>2</sup>             | -0.33 (-0.59 to -0.06)  | 0.015*         |
| HbA1c <sup>a</sup> , %             | 0.01 (-0.01 to 0.03)    | 0.416          |
| Glucose <sup>a</sup> , mg/dL       | -0.07 (-0.82 to 0.68)   | 0.862          |
| Systolic BP <sup>b</sup> , mmHg    | -1.54 (-2.38 to -0.70)  | <0.001*        |
| Diastolic BP <sup>b</sup> , mmHg   | -0.89 (-1.49 to -0.29)  | 0.004*         |
| LDL <sup>c</sup> , mg/dL           | 0.27 (-2.29 to 2.83)    | 0.836          |
| HDL <sup>c</sup> , mg/dL           | 1.45 (0.71 to 2.18)     | <0.001*        |
| Triglycerides <sup>c</sup> , mg/dL | -9.62 (-16.42 to -2.82) | 0.006*         |

Model 3: Model 1 + alcohol intake, smoking status, physical activity, and DASH dietary pattern score. Model 3 also includes BMI in all analyses except in the BMI analysis; and includes sodium intake per day only in the BP analyses.

<sup>a</sup> Excluding participants treated with anti-hypertensive drugs. <sup>b</sup> Excluding participants treated with anti-dyslipidemic drugs. <sup>c</sup> Excluding participants treated with antidiabetic drugs. \*statistically significant
